# Supplementary material
Source: HighWire-hosted journal article supplement (https://militaryhealth.bmj.com/highwire/filestream/160258/field_highwire_adjunct_files/0/military-2023-002578supp001_data_supplement.pdf)
Supplement: military-2023-002578supp001_data_supplement.pdf [file military-2023-002578supp001_data_supplement.pdf]

**Supplementary Table 1: Comparison of physical health comorbidities, functional outcomes, and functional levels between different amputation levels.**

| Physical health comorbidities,<br>functional outcomes, and functional<br>levels | Transfemoral<br>(n=7) | Transtibial<br>(n=78) |
|---------------------------------------------------------------------------------|-----------------------|-----------------------|
| Physical health comorbidities (%)                                               |                       |                       |
| Phantom limb pain                                                               | 71.4                  | 78.2                  |
| Diabetes                                                                        | 42.8                  | 33.3                  |
| Hypertension                                                                    | 14.3                  | 23.1                  |
| Knee osteoarthritis                                                             | 57.1                  | 15.4                  |
| Knee pain                                                                       | 42.8                  | 17.9                  |
| Back pain                                                                       | 71.4                  | 69.2                  |
| Functional outcomes (Mean (SD))                                                 |                       |                       |
| Functional mobility (2MWT)                                                      | 94.3 (6.8)            | 115.4 (14.1)          |
| Risk of falling (TUG test)*                                                     | 14.3 (2.9)            | 10.3 (1.3)            |
| Functional levels (%)*                                                          |                       |                       |
| K1 and K2                                                                       | 42.8                  | 2.3                   |
| K3                                                                              | 57.1                  | 73.1                  |
| K4                                                                              | 0                     | 24.6                  |

2MWT, 2-minute walk test; TUG, timed-up-and-go.

\* indicates significant difference in outcomes between transfemoral and transtibial at  $p < 0.05$  level
